1 **Who is most at risk of dying if infected with SARS-CoV-2? A mortality risk factor analysis**  
2 **using machine learning of COVID-19 patients over time in a large Mexican population.**

3 Lauren D. Liao,<sup>1\*</sup> Alan E. Hubbard,<sup>1</sup> Juan Pablo Gutiérrez,<sup>2</sup> Arturo Juárez-Flores,<sup>2</sup> Kendall  
4 Kikkawa,<sup>3</sup> Ronit Gupta,<sup>1</sup> Yana Yarmolich,<sup>1</sup> Iván de Jesús Ascencio-Montiel,<sup>4</sup> Stefano M.  
5 Bertozzi<sup>1,5,6</sup>

6 Affiliations:

7 <sup>1</sup> University of California, Berkeley, School of Public Health, Berkeley, CA, USA

8 <sup>2</sup> Center for Policy, Population & Health Research, School of Medicine, Universidad  
9 Nacional Autónoma de México, Mexico City, Mexico

10 <sup>3</sup> Micron Technology, Boise, ID, USA

11 <sup>4</sup> Instituto Mexicano del Seguro Social, CDMX, México

12 <sup>5</sup> University of Washington School of Public Health, Seattle, WA, USA

13 <sup>6</sup> Instituto Nacional de Salud Pública, Cuernavaca, MOR, México

14 **\*Correspondence to:** [ldliao@berkeley.edu](mailto:ldliao@berkeley.edu) (LDL)

15 Word count: 2884/3000

16  
17  
18  
19  
20  
21  
22  
23  
24  
25  
26  
27  
28

## 29 **Key messages**

### 30 **What is already known on this topic**

31 Studies for Mexico and other countries have suggested that pre-existing conditions such as renal  
32 disease, diabetes, hypertension, and obesity are strongly associated with COVID-19 mortality.  
33 While age and the presence of pre-existing conditions have been shown to predict mortality,  
34 other studies have typically used less powerful statistical approaches, have had smaller sample  
35 sizes, and have not been able to describe changes over time.

### 36 **What this study adds**

37 This study examines mortality risk in a very large population ( $> 60$  M); it uses powerful  
38 ensemble machine learning methods that outperform regression analyses; and it demonstrates  
39 marked changes over time in the degree to which different risk factors predict mortality.

### 40 **How this study might affect research, practice or policy**

41 Because we show an important improvement in predictive performance over traditional  
42 regression analyses, and the ability to update estimates as the pandemic evolves, we argue that  
43 these methods should be much more widely used to inform national programming in Mexico and  
44 elsewhere. Programs that assume that predictive models don't change over time as variants  
45 emerge and as pre-existing immunity evolves due to vaccination and prior infection will not  
46 accurately predict mortality risk.

47

48

## 49 **Abstract**

50 **Background:** COVID-19 would kill fewer people if health programs can predict who is at  
51 higher risk of mortality because resources can be targeted to protect those people from infection.  
52 We predict mortality in a very large population in Mexico with machine learning using  
53 demographic variables and pre-existing conditions.

54 **Methods:** We conducted a population-based cohort study with over 1.4 million laboratory-  
55 confirmed COVID-19 patients using the Mexican social security database. Analysis is performed  
56 on data from March 2020 to November 2021 and over three phases: (1) from March to October  
57 in 2020, (2) from November 2020 to March 2021, and (3) from April to November 2021. We  
58 predict mortality using an ensemble machine learning method, *super learner*, and independently  
59 estimate the adjusted mortality relative risk of each pre-existing condition using targeted  
60 maximum likelihood estimation.

61 **Results:** Super learner fit has a high predictive performance (C-statistic: 0.907), where age is the  
62 most predictive factor for mortality. After adjusting for demographic factors, renal disease,  
63 hypertension, diabetes, and obesity are the most impactful pre-existing conditions. Phase analysis  
64 shows that the adjusted mortality risk decreased over time while relative risk increased for each  
65 pre-existing condition.

66 **Conclusions:** While age is the most important predictor of mortality, younger individuals with  
67 hypertension, diabetes and obesity are at comparable mortality risk as individuals who are 20  
68 years older without any of the three conditions. Our model can be continuously updated to  
69 identify individuals who should most be protected against infection as the pandemic evolves.

70 **Keywords:** mortality; death; COVID-19; biostatistics; international health

## 71 **Introduction**

72           The probability that someone infected with SARS-CoV-2 dies has varied enormously  
73 over time, among countries, and among population groups within countries. Interest in  
74 understanding who is at a higher risk of death has grown as this heterogeneity became more  
75 apparent. Identifying people at higher risk of severe disease and death will help health systems  
76 better respond and focus prevention resources on protecting them. We examine Mexico, a  
77 country with a very high reported case-fatality rate (4.7%) among those who have laboratory-  
78 confirmed coronavirus disease 2019 (COVID-19) as of September 23, 2022 [1].

79           Previous analyses in Mexico have found diabetes, obesity, hypertension,  
80 immunosuppression, and renal disease to be significant risk factors along with age and sex.  
81 Multiple authors have identified obesity and diabetes as important risk factors for mortality [2–5].  
82 Escobedo de-la Peña et al. also found a strong association with hypertension, which is consistent  
83 with results from Giannouchos et al. [5,6]. Late-stage chronic kidney disease, although less  
84 prevalent, has also consistently been identified as a COVID-19 mortality risk factor . Older/ male  
85 patients tend to have higher mortality risks than younger/ female patients [3,5,6]. In a previous  
86 analysis, we found interactions between those comorbidities, suggesting a synergic effect when  
87 having more than one of diabetes, hypertension, and obesity (larger odds ratio when reporting the  
88 3 conditions vs. one or two) [7]. We also found that the odds ratio increased by age group with  
89 those over age 80 having 30-fold the risk of those 20 to 29 [7]. One important consideration is  
90 that the prevalence of diabetes and hypertension is positively associated with age, so it has not  
91 been clear how this interaction is related to mortality risk. A more adaptive analysis performed  
92 by Martínez-Martínez et al. developed a prediction model for severity of COVID-19, defined by  
93 hospitalization and/or mortality. They examined the relationship of 14 variables with

94 hospitalization and mortality using interaction terms and splines to account for non-linear  
95 relationships [8].

96         The pattern of age, sex, and comorbidities being associated with higher mortality risk is  
97 not specific to Mexico, and the global literature on such associations is extensive. Researchers  
98 have identified old age, diabetes, obesity, chronic renal failure, and congestive heart failure to be  
99 strongly associated with severe infection amongst both sexes in the Spanish population [9].  
100 Researchers in Brazil showed that older age, male, kidney disease, obesity and/ or diabetes are  
101 strong predictors of mortality amongst other comorbidities such as chronic liver disease,  
102 immunosuppression, and cardiovascular disease [10,11]. Another study used United Kingdom  
103 Biobank data and showed that pre-existing dementia, diabetes, chronic obstructive pulmonary  
104 disease (COPD), pneumonia, and depression were positively associated with risk of  
105 hospitalization and death [12]. An analysis from France found age, diabetes, hypertension,  
106 obesity, cancer, and kidney and lung transplants to be associated with risk of COVID-19-related  
107 hospitalization and mortality, among others [13]. A Canadian study reported dementia, chronic  
108 kidney disease, cardiovascular disease, diabetes, COPD, severe mental illness, organ transplant,  
109 hypertension, and cancer to be significant predictors of mortality [14]. Our goal in this study is  
110 not only to predict mortality using demographic factors and comorbidities, but to show how  
111 those predictions change over time in this rapidly evolving pandemic.

112         Although mortality risk estimation and risk factor identification have been examined in  
113 prior studies, we are concerned about the statistical validity and interpretation of the standard  
114 methods. A commonly used prediction tool, logistic regression, assumes a linear relationship of  
115 predictors against the log odds of mortality risk, but this logit-linear assumption will lead  
116 inevitably to biased estimates of risk (either under- or over-predict the risk) for subsets of the

117 population. We instead used flexible, data-adaptive methods that can capture non-linearities in  
118 the dose-response, such as potential nonlinear interactions between the predictors (e.g., the  
119 potential interaction of age and diabetes on predicting death) [15,16]. The better the model fits  
120 the study population; the more likely estimates are closer to the true joint relationship of  
121 mortality and risk factors.

122 We included pre-existing conditions, demographic variables, the Mexican state where the  
123 patient was treated, and the month that the patient initiated care to fit our prediction algorithm.  
124 We conducted the analysis using an ensemble machine learning algorithm, super learner, to form  
125 optimal combination of predictions from multiple machine learning methods [15,16]. We also  
126 estimated the comparative importance of variables for mortality risk prediction (holding all other  
127 variables constant) by nonparametrically estimating quantities inspired by causal parameters  
128 (parameters that compare so-called counterfactual distributions, in our case, causal relative risks).  
129 The statistical goal is to estimate and provide robust inference for impact estimates of the  
130 predictors without the arbitrary modeling assumptions that characterize the great majority of  
131 prior work [17].

## 132 **Methods**

### 133 **Study population and design**

134 The study population is drawn from the Mexican Social Security Institute (IMSS), a  
135 vertically integrated insurance and health system that provides coverage for over 60 million  
136 private sector employees and their families, including their parents, children and spouse. IMSS  
137 also provided care as part of the COVID-19 response for some non-beneficiaries, who are also  
138 included in the dataset.

139           The data were recorded from March 1st, 2020, to November 3rd, 2021 in a platform  
140 called SINOLAVE. They reflect the entire population of 4,482,292 patients who were registered  
141 as receiving care for suspected COVID-19 at an IMSS facility. The dataset and the data entry  
142 process have been described previously [18]. The demographic variables include age, sex,  
143 insured by IMSS, and indigenous status. The data contains pre-existing conditions reported by  
144 the patient or the family at presentation: asthma, cardiovascular disease, chronic liver disease,  
145 chronic obstructive pulmonary disease, diabetes, hemolytic anemia, human immunodeficiency  
146 virus, hypertension, immunosuppression, neurological disease, obesity, cancer, renal disease and  
147 tuberculosis, as well as whether the patient currently smokes. Patients were asked at presentation  
148 about their pre-existing health conditions; these were not ascertained with reference to the  
149 patient's medical record, even for those patients insured by the IMSS. The data also includes the  
150 Mexican state in which the patient received care, COVID-19 test results (from both polymerase  
151 chain reaction (PCR) tests and antigen tests), the month that the patient initiated care, and  
152 mortality. In addition, we extracted a different dataset from the National Council of Science and  
153 Technology to determine the dominant circulating variant in each month [19]. A short summary  
154 can be found in **Table 1 (Supplemental Table S1)**. We define COVID-19 positive as a positive  
155 PCR or antigen test.

156           From the full data set, we generated an analytic sample ( $n = 1,423,720$ ) (**Supplemental**  
157 **Figure S1**). We exclude those under the age of 20 years, those without any positive COVID-19  
158 test result from either the PCR or antigen tests, and those with unknown pre-existing conditions.  
159 We also create a phase variable that corresponds to changes in the epidemic curve into three:  
160 phase 1 is from March 1st, 2020, to October 31st, 2020, phase 2 is from November 1st, 2020, to

161 March 31st, 2021, and phase 3 is from April 1st, 2021, to November 3rd, 2021 as previously  
162 described [18].

## 163 **Statistical analysis**

### 164 **Mortality risk prediction using super learner (SL)**

165 We predict mortality risks with SL [15,16], using predictors: pre-existing conditions,  
166 demographic variables, the Mexican state where the patient was treated, and the month that the  
167 patient initiated care. SL combines a set of user-supplied machine learning algorithms, which  
168 includes both simple, parametric fits and flexible algorithms, to create an optimally-weighted  
169 combination. This optimal fit is found by creating a combination of algorithms that minimize the  
170 cross-validated risk (in our case, the negative log-likelihood). SL has the property that  
171 asymptotically it will perform at least as well as the best fitting algorithm in the library [15,16].  
172 Thus, it is important to include a diverse and large set of learners as candidates to ensure the  
173 model can fit complex patterns if warranted, but also, simpler, parametric models if simpler fits  
174 are sufficient. The following learners were included in the SL library: Bayesian additive  
175 regression trees [21], Bayesian generalized linear model [22], elastic net regression [23],  
176 empirical mean, generalized additive model [24], least absolute shrinkage and selection operator  
177 regression [25], logistic regression, multivariate adaptive regression splines [26], random forest  
178 [27], ridge regression [28], and extreme gradient boosting algorithms [29]. We estimate the  
179 prediction performance, via the AUC, and derive a 95% confidence interval for the estimated  
180 AUC [30]. We compare the SL fit using all predictors listed above to a logistic regression with  
181 only age entered as a linear term. We compute the AUC for the resulting SL/logistic regression  
182 fits with 3-fold cross validation on the 80%, both on the same data used to estimate SL/logistic



183 regression models (training AUC), as well as a more realistic assessment by using the test set –  
184 the left-out 20% of the available data (testing AUC).

185 To interpret the final prediction model generated by the SL fit, we use the permutation-  
186 based variable importance measure to identify variables that influence the SL model’s prediction  
187 [27]. This is performed by permuting the predictor variables one at a time (keeping the other  
188 variables fixed) and measuring the magnitude of the decline on the predictive performance (as  
189 measured by the change in the average negative log-likelihood). This provides a list of variables  
190 ranked by the relative importance to prediction fit but does not provide information on the  
191 variable impact on mortality, which led us to another measure of relative risk (RR) using targeted  
192 maximum likelihood estimation (TMLE).

### 193 **Pre-existing condition relative risk estimate through targeted maximum likelihood** 194 **estimation**

195 For pre-existing conditions, we estimated a different variable importance measure that is  
196 not focused on prediction accuracy but on estimating potential impacts of pre-existing conditions  
197 on mortality risk. The impact is estimated by the RR of adjusted means (adjusted for baseline  
198 confounders) for the population if everyone had the specific pre-existing condition of interest  
199 (the numerator) versus the same population where no one has the specific pre-existing condition  
200 (the denominator). To estimate RRs, we used cross-validated targeted minimum-loss-based  
201 estimation (cross-validated TMLE). TMLE is a semiparametric, substitution estimator that has  
202 shown to be asymptotically efficient (unlike the inverse probability of treatment-weighting  
203 estimators [31]). It also has some robustness advantages over other semiparametric efficient  
204 approaches, such as augmented inverse probability weighting. TMLE estimates parameters that,

205 under certain assumptions, can be interpreted as potential causal impacts of these factors on  
206 mortality, in our case, in the form of a causal relative risk. Our ensemble machine learning is  
207 optimized for prediction, but it does not directly provide measures of individual variable  
208 importance. We conducted follow-up procedure (TMLE) to generate interpretable estimates of  
209 variable impact with robust standard errors [32, 33].

## 210 **Results**

211 Descriptive results show the age distribution of laboratory-confirmed patients across the  
212 three different epidemic phases (**Supplemental Figure S2**). Phases 1 and 2 have similar  
213 distributions, and there are more young people (under 30) in phase 3. The six most prevalent pre-  
214 existing conditions are hypertension, obesity, diabetes, smoking, asthma, and renal disease  
215 (**Supplemental Figure S3**). The prevalence of all pre-existing conditions decreased over the  
216 three phases, and prevalence of hypertension, obesity, and diabetes were drastically reduced in  
217 phase 3.

### 218 **Super learner (SL) prediction**

219 SL fit has high prediction accuracy on the testing set (AUC: 0.907 (95% CI: (0.905-  
220 0.908))). SL leverages XGBoost models (**Supplemental Table S2**) and significantly outperforms  
221 the simple logistic regression model (testing AUC: 0.874 (95% CI: (0.872-0.876))) (**Table 2**).  
222 The logistic regression model overpredicts mortality risks for those roughly above age 75  
223 compared to the SL prediction (**Fig. 1**). Permuted variable importance shows, while holding  
224 other variables constant, age is consistently the most important for SL prediction in average  
225 mortality risk (**Supplemental Figure S4 and Table S3**). Having multiple comorbidities can  
226 dramatically increase risk for those individuals (**Fig. 2**).

## 227 **Relative risks of pre-existing conditions**

228 To assess the impact of each pre-existing condition, we estimate their respective relative  
229 risks (RRs) of mortality, adjusting for demographic variables. We report the estimated RRs in  
230 **Table 3**, ordered by impact (most to least) (**Supplemental Figure S5**). The RRs compare the  
231 expected risk if all patients have the pre-existing condition (with) versus if all patients do not  
232 have the condition (without). The highest impact pre-existing condition is renal disease (RR:  
233 3.783, 95% CI: (3.705, 3.862)); diabetes, obesity, and hypertension also have high impact  
234 individually (RR: 1.432-1.847). Minimal differences between the risk estimates are shown for  
235 smoking and asthma (RR: 1.049 and 1.037, respectively).

236 The phase analyses indicate pre-existing conditions are especially important in phase 3.  
237 Phase 1 and 2 are very similar in terms of both risk prediction and adjusted mortality risk  
238 estimates. However, in phase 3, age is less important in prediction (**Supplemental Table S3**) and  
239 RRs drastically increase for every comorbidity. The adjusted risks show the decrease for each  
240 pre-existing condition in phase 3 (**Supplemental Table S4**).

## 241 **Discussion**

242 Our analysis of (>1.4 million) laboratory-confirmed COVID-19 patients demonstrates  
243 that age is by far the most important predictor of average mortality. For those patients with renal  
244 disease, diabetes, hypertension, or obesity, having the comorbidity further increases their risk of  
245 mortality. A patient with diabetes, hypertension, and obesity is roughly comparable to a patient  
246 20 years older with none of the conditions, based on the predicted mortality (**Fig. 2**). Thus,  
247 having a comorbidity increases risk of mortality and should be considered at any age. The reason  
248 that comorbidities add little to the predictive power at younger ages is that hypertension and

249 diabetes are age-related and the reported onset is often for those over 30, so the pre-existing  
250 conditions are far less prevalent.

251 Our prediction results using machine learning methods predict better than previous  
252 studies, and we demonstrated the feasibility and robustness of using machine learning methods  
253 targeted for prediction and variable impact. SL model prediction has an AUC of 0.907, which is  
254 higher than any previous Mexican study (AUCs from 0.634 to 0.824) [8,34]. Although age has  
255 been well reported by previous studies as important [5,34,35], our analysis is more robust  
256 because we do not assume a pre-specified functional relationship between the explanatory  
257 variables and the predicted variable, and thereby avoid any arbitrary groupings into age  
258 categories. Moreover, since those above age 60 have a higher prevalence of comorbidities,  
259 relying on simple logistic regression models can greatly overpredict the average mortality risk  
260 for the elder patients. Our study applies TMLE to estimate the adjusted mortality risk ratios for  
261 each comorbidity to provide more robust impact estimates that respect time ordering and account  
262 for background variables.

263 We find consistent results of comorbidities compared to previous studies, and present  
264 phase analyses highlighting the changes in relative risks over time. Previous results from logistic  
265 regressions indicated odds ratios of 1.458-2.48 for renal disease, 1.237-1.74 for diabetes, 1.173-  
266 1.47 for obesity, 1.194-1.315 for hypertension, 0.852-1.02 for smoking, and 0.74-1.420 for  
267 asthma [34–36]. Although our analysis is generally consistent with previous findings, our RR  
268 estimations have less uncertainty. Renal disease has the greatest impact on mortality, followed  
269 by diabetes, hypertension, and obesity; smoking and asthma have negligible impact on mortality  
270 risk.

271 This phase-specific analysis produced a seemingly paradoxical finding. The impact of  
272 comorbidities on predicted mortality decreased with time (primarily between the second and  
273 third wave), but the RR on mortality dramatically increased for the same conditions  
274 **(Supplemental Table S4 and Figure S5)**. The apparent explanation is that mortality risk for  
275 people without the comorbidities fell faster than for people with them, increasing the relative risk.  
276 The decrease in mortality risk is multifactorial and includes a decrease in susceptibility over time  
277 (due to prior infection and vaccination), improved treatment, enhanced healthcare response and  
278 opportunity to be admitted to a hospital or ICU, and less virulent viral subtypes. This implies that  
279 as herd immunity increases, medical resources should focus even more on protecting vulnerable  
280 people at older age and those with comorbidities since they are even more likely to experience  
281 severe outcomes compared to those who are younger and/or healthier.

282 Readers should be cautious about extrapolating our findings to other populations.  
283 Although our sample is large and includes patients from all parts of Mexico, most of the patients  
284 were IMSS beneficiaries. In order to access IMSS health services, patients require: a) be a  
285 formal-sector worker or retired, b) be a direct dependent of such an employee, c) be a bachelor or  
286 postgraduate student in a public institution, d) voluntarily enroll by paying a fee. Thus, the IMSS  
287 population skews toward the upper half of the income distribution. Populations without similar  
288 access to health services may have different results. It is also important to consider the potential  
289 impact of data quality. Pre-existing conditions were self-reported and likely also inconsistently  
290 recorded, perhaps in systematic ways that could have biased the results. For example, if people  
291 with severe diabetes were more likely to report diabetes as a pre-existing condition, we may  
292 overestimate the impact of diabetes on mortality.

293           It is also important to consider what predictive variables are included in this model. We  
294 sought to predict risk for an individual in the population using their characteristics prior to  
295 infection. In other words, what is this person’s risk of death from COVID-19 if they were to be  
296 infected? The answer to this question best informs the question of who should be prioritized for  
297 protection against infection or for early therapeutic interventions following infection. It does not  
298 attempt to predict the likely mortality of a patient who presents to the health services with  
299 COVID-19 because information about that patient’s severity of their COVID-19-related  
300 symptoms will represent important additional predictors of their mortality risk.

301 **Abbreviations**

302 AUC, area under the receiver operating characteristic curve; CI, confidence interval; COPD,  
303 chronic obstructive pulmonary disease; COVID-19, coronavirus disease of 2019; IMSS, Mexican  
304 Social Security Institute; PCR, polymerase chain reaction; RR, relative risk; SL, super learner;  
305 TMLE, targeted maximum likelihood estimation; XGBoost, extreme gradient boosting

306

307 **Declarations:**

308 **Acknowledgements**

309 We thank the staff of C3.ai DTI for their technical support and our colleagues at University of  
310 California, Berkeley, the Mexican National Autonomous University, and the Mexican Social  
311 Security Institute (IMSS) for all of the administrative and technical support that has allowed this  
312 collaboration to flourish.

313 **Authors' contributions**

314 LDL and AEH contributed to the study design and methodology. AJ, YY, and IA contributed to  
315 data acquisition. LDL, YY, and KK contributed to data cleaning. LDL led the data analysis and  
316 visualization. LDL, AEH, JPG, and SMB interpreted the results. LDL drafted the manuscript  
317 with support from RG on literature search. AEH and SMB significantly contributed to the  
318 revision of the manuscript. All authors participated in review and edited the manuscript; all  
319 authors have read and approved the final manuscript. All authors had full access to all the data in  
320 the study and accepted responsibility to submit for publication. All authors take responsibility for  
321 the integrity of the data and the accuracy of the data analysis.

322 **Funding**

323 This research effort was funded by the C3.ai Digital Transformation Institute. The C3.ai DTI was  
324 established by C3.ai, Microsoft, the University of California, Berkeley (UC Berkeley), the  
325 University of Illinois at Urbana-Champaign (UIUC), Carnegie Mellon University, University of  
326 Chicago, MIT, and Princeton University. It is being funded in cash and in kind by C3.ai,  
327 Microsoft Azure, and the Lawrence Berkeley National Laboratory. The funders had no role in  
328 access to data, design of the research, or analyses conducted. They have not seen or contributed  
329 to the manuscript in any way.

330 In addition, LDL received funding from the National Science Foundation (DGE 2146752). AEH  
331 received funding from a global development grant (OPP1165144) from the Bill & Melinda Gates  
332 Foundation to the University of California, Berkeley, CA, USA.

333 **Availability of data and materials**

334 The study was conducted using confidential patient records subject to strict access controls and  
335 we are therefore unable to share the data that were used for this study.

336 **Ethics approval and consent to participate**

337 This data-only study was approved on November 4th, 2020, by the Scientific Research National  
338 Committee (Social Security Mexican Institute) with R-2020-785-165. The University of  
339 California, Berkeley Institutional Review Board (IRB) determined that the project was exempt  
340 from IRB approval.

341 **Consent for publication**

342 Not applicable.



343 **Competing interests**

344 All authors declare no competing interests.

## References

- 345  
346  
347 1. Hopkins. University of Medicine. Coronavirus Resource Center. *Data Stream* 2020.
- 348 2. Singer M. Deadly Companions: COVID-19 and Diabetes in Mexico. *Med Anthropol*  
349 2020;**39**:660–5.
- 350 3. Bello-Chavolla OY, Bahena-López JP, Antonio-Villa NE, *et al.* Predicting Mortality Due  
351 to SARS-CoV-2: A Mechanistic Score Relating Obesity and Diabetes to COVID-19 Outcomes  
352 in Mexico. *J Clin Endocrinol Metab* 2020;**105**. doi:10.1210/clinem/dgaa346
- 353 4. Noyola DE, Hermosillo-Arredondo N, Ramírez-Juárez C, *et al.* Association between  
354 obesity and diabetes prevalence and COVID-19 mortality in Mexico: an ecological study. *J*  
355 *Infect Dev Ctries* 2021;**15**:1396–403.
- 356 5. Giannouchos TV, Sussman RA, Mier Odriozola JM, *et al.* Characteristics and risk factors  
357 for COVID-19 diagnosis and adverse outcomes in Mexico: an analysis of 89,756 laboratory–  
358 confirmed COVID-19 cases. bioRxiv. 2020. doi:10.1101/2020.06.04.20122481
- 359 6. Peña JE la, Rascón-Pacheco RA, Ascencio-Montiel I de J, *et al.* Hypertension, Diabetes  
360 and Obesity, Major Risk Factors for Death in Patients with COVID-19 in Mexico. *Arch Med Res*  
361 2021;**52**:443–9.
- 362 7. Gutierrez JP, Bertozzi SM. Non-communicable diseases and inequalities increase risk of  
363 death among COVID-19 patients in Mexico. *PLoS One* 2020;**15**:e0240394.
- 364 8. Martínez-Martínez MU, Alpízar-Rodríguez D, Flores-Ramírez R, *et al.* An Analysis  
365 COVID-19 in Mexico: a Prediction of Severity. *J Gen Intern Med* 2022;**37**:624–31.
- 366 9. Gimeno-Miguel A, Bliet-Bueno K, Poblador-Plou B, *et al.* Chronic diseases associated  
367 with increased likelihood of hospitalization and mortality in 68,913 COVID-19 confirmed cases  
368 in Spain: A population-based cohort study. *PLoS One* 2021;**16**:e0259822.
- 369 10. Soares R de CM, Mattos LR, Raposo LM. Risk Factors for Hospitalization and Mortality  
370 due to COVID-19 in Espírito Santo State, Brazil. *Am J Trop Med Hyg* 2020;**103**:1184–90.
- 371 11. Wollenstein-Betech S, Silva AAB, Fleck JL, *et al.* Physiological and socioeconomic  
372 characteristics predict COVID-19 mortality and resource utilization in Brazil. *PLoS One*  
373 2020;**15**:e0240346.
- 374 12. Atkins JL, Masoli JAH, Delgado J, *et al.* Preexisting Comorbidities Predicting COVID-  
375 19 and Mortality in the UK Biobank Community Cohort. *J Gerontol A Biol Sci Med Sci*  
376 2020;**75**:2224–30.
- 377 13. Semenzato, Botton, Drouin, *et al.* Chronic diseases, health conditions and risk of  
378 COVID-19-related hospitalization and in-hospital mortality during the first wave of the epidemic  
379 in France: a .... *The Lancet Regional*  
380 <https://www.sciencedirect.com/science/article/pii/S2666776221001356>

- 381 14. Ge E, Li Y, Wu S, *et al.* Association of pre-existing comorbidities with mortality and  
382 disease severity among 167,500 individuals with COVID-19 in Canada: A population-based  
383 cohort study. *PLoS One* 2021;**16**:e0258154.
- 384 15. van der Laan MJ, Polley EC, Hubbard AE. Super learner. *Stat Appl Genet Mol Biol*  
385 2007;**6**:Article25.
- 386 16. Polley EC, van der Laan MJ. Super Learner In Prediction. Published Online First:  
387 2010.[https://biostats.bepress.com/ucbbiostat/paper266/?TB\\_iframe=true&width=370.8&height=](https://biostats.bepress.com/ucbbiostat/paper266/?TB_iframe=true&width=370.8&height=658.8)  
388 658.8 (accessed 26 Jul 2022).
- 389 17. Petersen ML, van der Laan MJ. Causal models and learning from data: integrating causal  
390 modeling and statistical estimation. *Epidemiology* 2014;**25**:418–26.
- 391 18. Juárez-Flores A, Ascencio-Montiel IJ, Gutiérrez JP, *et al.* COVID-19 in the Mexican  
392 Social Security Institute (IMSS) population. Prevalent symptoms. bioRxiv. 2022.  
393 doi:10.1101/2022.04.12.22273734
- 394 19. Vigilancia de variantes del virus SARS-CoV-2. Vigilancia de variantes del virus SARS-  
395 CoV-2. <https://salud.conacyt.mx/coronavirus/variantes/>. (accessed 29 Jul 2022).
- 396 20. Hubbard AE, Kennedy CJ, van der Laan MJ. Data-Adaptive Target Parameters. In: van  
397 der Laan MJ, Rose S, eds. *Targeted Learning in Data Science: Causal Inference for Complex*  
398 *Longitudinal Studies*. Cham: : Springer International Publishing 2018. 125–42.
- 399 21. Chipman HA, George EI, McCulloch RE. BART: Bayesian additive regression trees.  
400 *aoas* 2010;**4**:266–98.
- 401 22. Dey DK, Ghosh SK, Mallick BK. *Generalized linear models: A Bayesian perspective*.  
402 CRC Press 2000.
- 403 23. Hans C. Elastic Net Regression Modeling With the Orthant Normal Prior. *J Am Stat*  
404 *Assoc* 2011;**106**:1383–93.
- 405 24. Liu. Generalized additive model. *Rep Univ Jyvaskyla Dep Math Stat* Published Online  
406 First: 2008.<http://people.vcu.edu/~dbandyop/BIOS625/GAM.pdf>
- 407 25. Tibshirani R. Regression Shrinkage and Selection via the Lasso. *J R Stat Soc Series B*  
408 *Stat Methodol* 1996;**58**:267–88.
- 409 26. Friedman JH. Multivariate Adaptive Regression Splines. *aos* 1991;**19**:1–67.
- 410 27. Breiman L. Random Forests. *Mach Learn* 2001;**45**:5–32.
- 411 28. Hoerl AE, Kennard RW. Ridge Regression: Biased Estimation for Nonorthogonal  
412 Problems. *Technometrics* 1970;**12**:55–67.

- 413 29. Chen T, Guestrin C. XGBoost: A Scalable Tree Boosting System. In: *Proceedings of the*  
414 *22nd ACM SIGKDD International Conference on Knowledge Discovery and Data Mining*. New  
415 York, NY, USA: : Association for Computing Machinery 2016. 785–94.
- 416 30. LeDell E, Petersen M, van der Laan M. Computationally efficient confidence intervals  
417 for cross-validated area under the ROC curve estimates. *Electron J Stat* 2015;**9**:1583–607.
- 418 31. Rosenbaum PR. Model-Based Direct Adjustment. *J Am Stat Assoc* 1987;**82**:387–94.
- 419 32. van der Laan MJ, Rubin D. Targeted Maximum Likelihood Learning. *Int J Biostat*  
420 2006;**2**. doi:10.2202/1557-4679.1043
- 421 33. Porter KE, Gruber S, van der Laan MJ, *et al*. The relative performance of targeted  
422 maximum likelihood estimators. *Int J Biostat* 2011;**7**. doi:10.2202/1557-4679.1308
- 423 34. Wollenstein-Betech S, Cassandras CG, Paschalidis IC. Personalized predictive models  
424 for symptomatic COVID-19 patients using basic preconditions: Hospitalizations, mortality, and  
425 the need for an ICU or ventilator. *Int J Med Inform* 2020;**142**:104258.
- 426 35. Parra-Bracamonte GM, Lopez-Villalobos N, Parra-Bracamonte FE. Clinical  
427 characteristics and risk factors for mortality of patients with COVID-19 in a large data set from  
428 Mexico. *Ann Epidemiol* 2020;**52**:93–8.e2.
- 429 36. Hernández-Galdamez DR, González-Block MÁ, Romo-Dueñas DK, *et al*. Increased Risk  
430 of Hospitalization and Death in Patients with COVID-19 and Pre-existing Noncommunicable  
431 Diseases and Modifiable Risk Factors in Mexico. *Arch Med Res* 2020;**51**:683–9.  
432  
433  
434  
435  
436  
437  
438  
439  
440  
441  
442  
443  
444  
445  
446  
447  
448

**Table 1. Summary table of baseline variables and pre-existing conditions**

|                                      | <b>All time</b><br>(2020/03-<br>2021/11) | <b>Phase 1</b><br>(2020/03-<br>2020/10) | <b>Phase 2</b><br>(2020/11-<br>2021/03) | <b>Phase 3</b><br>(2021/04-<br>2021/11) |
|--------------------------------------|------------------------------------------|-----------------------------------------|-----------------------------------------|-----------------------------------------|
| Sample size                          | 1,423,720                                | 303,278                                 | 425,698                                 | 694,744                                 |
| <b>Demographic variables</b>         |                                          |                                         |                                         |                                         |
| Age in years (mean (SD))             | 42.15 (15.70)                            | 46.41 (16.04)                           | 44.89 (16.27)                           | 38.61 (14.34)                           |
| Sex = male (%)                       | 729,782 (51.3)                           | 158,248 (52.2)                          | 218,165 (51.2)                          | 353,369 (50.9)                          |
| Insured by IMSS = yes (%)            | 1,358,440<br>(95.4)                      | 288,588 (95.2)                          | 402,754 (94.6)                          | 667,098 (96.0)                          |
| Indigenous = yes (%)                 | 7,381 (0.5)                              | 2,200 (0.7)                             | 1,628 (0.4)                             | 3,553 (0.5)                             |
| <b>Pre-existing conditions</b>       |                                          |                                         |                                         |                                         |
| Hypertension = yes (%)               | 228,901 (16.1)                           | 72,615 (23.9)                           | 83,735 (19.7)                           | 72,551 (10.4)                           |
| Diabetes = yes (%)                   | 169,869 (11.9)                           | 55,551 (18.3)                           | 61,120 (14.4)                           | 53,198 (7.7)                            |
| Obesity = yes (%)                    | 181,736 (12.8)                           | 55,965 (18.5)                           | 60,217 (14.1)                           | 65,554 (9.4)                            |
| Smoking = yes (%)                    | 87,161 (6.1)                             | 21,253 (7.0)                            | 28,346 (6.7)                            | 37,562 (5.4)                            |
| Asthma = yes (%)                     | 25,297 (1.8)                             | 7,951 (2.6)                             | 7,765 (1.8)                             | 9,581 (1.4)                             |
| Renal Disease Diagnosis =<br>yes (%) | 24,099 (1.7)                             | 8,912 (2.9)                             | 8,555 (2.0)                             | 6,632 (1.0)                             |
| <b>Outcome</b>                       |                                          |                                         |                                         |                                         |
| Death = yes (%)                      | 149,805 (10.5)                           | 53,530 (17.7)                           | 62,517 (14.7)                           | 33,758 (4.9)                            |

IMSS: Mexican Institute of Social Security; SD: standard deviation

**Table 2. Prediction results**

|                                     | All time<br>(2020/03-<br>2021/11)<br>AUC (95% CI) | Phase 1<br>(2020/03-<br>2020/10)<br>AUC (95%CI) | Phase 2<br>(2020/11-<br>2021/03)<br>AUC (95%CI) | Phase 3<br>(2021/04-<br>2021/11)<br>AUC (95%CI) |
|-------------------------------------|---------------------------------------------------|-------------------------------------------------|-------------------------------------------------|-------------------------------------------------|
| Super learner fit                   | Training: 0.916<br>(0.915-0.917)                  | Training: 0.887<br>(0.885-0.888)                | Training: 0.904<br>(0.903-0.906)                | Training: 0.914<br>(0.913-0.916)                |
|                                     | Testing: 0.907<br>(0.905-0.908)                   | Testing: 0.873<br>(0.870-0.876)                 | Testing: 0.895<br>(0.892-0.897)                 | Testing: 0.906<br>(0.902-0.909)                 |
| Age only logistic<br>regression fit | Training: 0.874<br>(0.873-0.875)                  | Training: 0.845<br>(0.843-0.846)                | Training: 0.868<br>(0.866-0.870)                | Training: 0.867<br>(0.865-0.869)                |
|                                     | Testing: 0.874<br>(0.872-0.876)                   | Testing: 0.846<br>(0.842-0.850)                 | Testing: 0.871<br>(0.868-0.874)                 | Testing: 0.871<br>(0.866-0.875)                 |

AUC: area under the receiver operating characteristic curve; CI: confidence interval

**Table 3. Targeted maximum likelihood estimation relative risk results for each pre-existing condition**

|               | All time<br>(2020/03-<br>2021/11)<br>Relative Risk<br>(95% CI) | Phase 1<br>(2020/03-2020/10)<br>Relative Risk<br>(95% CI) | Phase 2<br>(2020/11-2021/03)<br>Relative Risk<br>(95% CI) | Phase 3<br>(2021/04-2021/11)<br>Relative Risk<br>(95% CI) |
|---------------|----------------------------------------------------------------|-----------------------------------------------------------|-----------------------------------------------------------|-----------------------------------------------------------|
| Renal disease | 3.783<br>(3.705, 3.862)                                        | 2.588<br>(2.521, 2.657)                                   | 2.994<br>(2.910, 3.080)                                   | 6.638<br>(6.361, 6.927)                                   |
| Diabetes      | 1.847<br>(1.820, 1.875)                                        | 1.536<br>(1.508, 1.566)                                   | 1.594<br>(1.564, 1.625)                                   | 2.508<br>(2.423, 2.596)                                   |
| Hypertension  | 1.745<br>(1.721, 1.770)                                        | 1.427<br>(1.402, 1.452)                                   | 1.500<br>(1.474, 1.527)                                   | 2.356<br>(2.279, 2.436)                                   |
| Obesity       | 1.432<br>(1.417, 1.447)                                        | 1.269<br>(1.249, 1.288)                                   | 1.259<br>(1.239, 1.279)                                   | 1.794<br>(1.750, 1.840)                                   |
| Smoking       | 1.049<br>(1.030, 1.068)                                        | 1.001<br>(0.975, 1.028)                                   | 0.992<br>(0.966, 1.018)                                   | 1.158<br>(1.107, 1.210)                                   |
| Asthma        | 1.037<br>(1.002, 1.073)                                        | 0.941<br>(0.895, 0.989)                                   | 0.942<br>(0.892, 0.995)                                   | 1.223<br>(1.134, 1.319)                                   |

CI: confidence interval

**Fig. 1. Mortality risk prediction comparing age only logistic regression and super learner**

GAM: generalized additive model

The smoothed true mortality risk curve is generated using a GAM with integrated smoothness estimation fitted with cubic splines.



**Fig. 2. Super learner predicted mortality risk averaged by specific age in two subgroups: those having all obesity, diabetes, and hypertension pre-existing conditions versus those without**

## **Supplemental Material**

### SupplementalMaterial.pdf:

Table S1. TableS1 – [Complete table of baseline variables and pre-existing conditions]

Table S2. TableS2 – [Weighted combination of the super learner fit]

Table S3. TableS3 – [Top 5 ranked most important variables for prediction]

Table S4. TableS4 – [Targeted maximum likelihood estimation adjusted mortality risk, with or without the pre-existing condition]

Figure S1. FigS1 – [Flowchart for analytic sample development]

Figure S2. FigS2 – [Age distribution for laboratory-confirmed COVID-19 patients]

Figure S3. FigS3 – [Prevalence of pre-existing conditions prevalence over time]

Figure S4. FigS4 – [Prediction variable importance predicted using the super learner fit]

Figure S5. FigS5 – [Relative risk for each pre-existing condition associated with mortality]

# Age-specific mortality risk

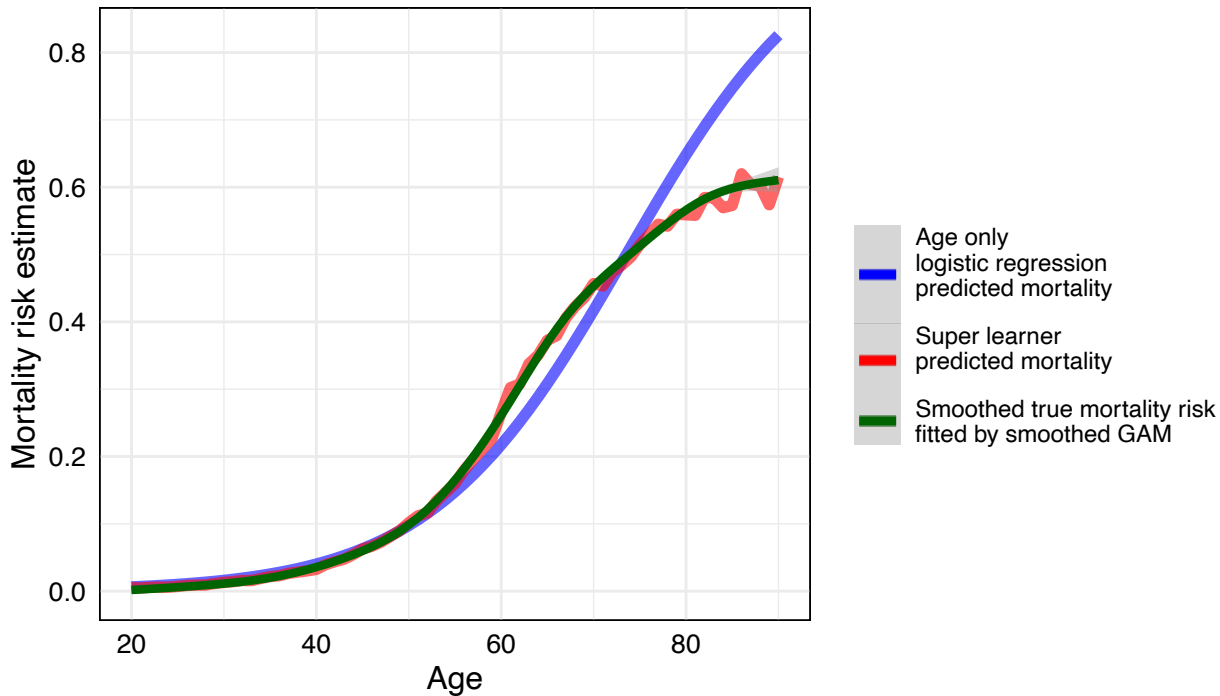

# Mortality risk comparison between those with versus without multiple pre-existing conditions

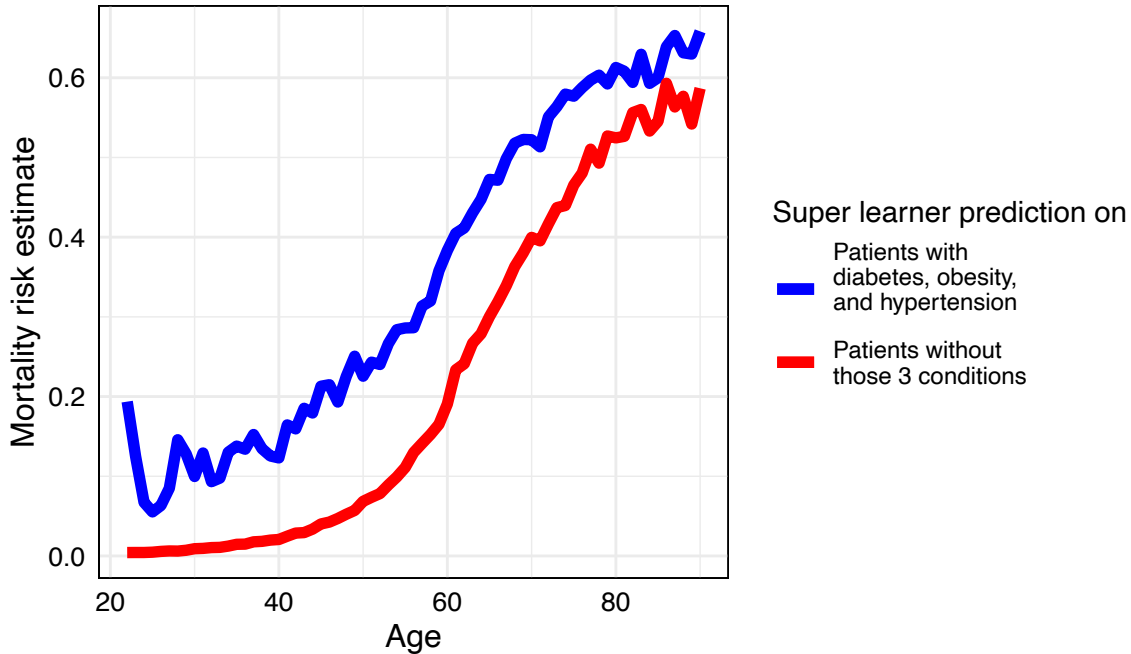

Source: https://www.medrxiv.org/content/10.1101/2023.01.17.23284684v1.full.pdf
